# Supplementary material for: Development of the cephalopod-specific universal primer set and its application for the metabarcoding analysis of planktonic cephalopods in Korean waters
Source: PeerJ. 2019 Jun 13;7:e7140. doi: 10.7717/peerj.7140 (PMC6571131; doi:10.7717/peerj.7140)
Supplement: Supplemental Information 1 [file peerj-07-7140-s001.xlsx]

## Sheet: Sheet1
Station No.	Location	February (131)	March (30)	April (82)	May (130)	June (32)	August (129)	October (79)	November (126)
1	38.25°N, 128.75°E	O		O			O	O	O
2	38.25°N, 129.25°E	O	O				O		O
3	38.25°N, 129.75°E	O		O			O	O	O
4	38.25°N, 130.25°E	O		O			O	O	O
5	38.25°N, 130.75°E	O	O	O			O	O	O
6	38.25°N, 131.25°E	O		O			O	O	O
7	38.25°N, 131.75°E	O		O			O		O
8	38.25°N, 132.25°E	O		O
9	38.25°N, 132.75°E	O
10	37.75°N, 129.25°E	O		O			O	O	O
11	37.75°N, 129.75°E	O	O				O		O
12	37.75°N, 130.25°E	O					O		O
13	37.75°N, 130.75°E	O		O			O	O	O
14	37.75°N, 131.25°E	O		O			O	O	O
15	37.75°N, 131.75°E	O	O				O		O
16	37.75°N, 132.25°E	O
17	37.75°N, 132.75°E	O
18	37.25°N, 129.25°E	O		O			O	O	O
19	37.25°N, 129.75°E	O		O			O	O	O
20	37.25°N, 130.25°E	O					O		O
21	37.25°N, 130.75°E	O	O	O			O	O	O
22	37.25°N, 131.25°E	O		O			O	O	O
23	37.25°N, 131.75°E	O					O		O
24	37.25°N, 132.75°E	O
25	36.75°N, 129.75°E	O		O			O	O	O
26	36.75°N, 130.25°E	O					O		O
27	36.75°N, 130.75°E	O					O		O
28	36.75°N, 131.25°E	O					O		O
29	36.75°N, 131.75°E	O	O				O		O
30	36.5°N, 129.5°E					O
31	36.5°N, 130.25°E					O
32	36.5°N, 131°E					O
33	36.25°N, 129.75°E	O	O	O		O	O	O	O
34	36.25°N, 130.25°E	O					O		O
35	36.25°N, 130.5°E					O
36	36.25°N, 130.75°E	O	O				O		O
37	36.25°N, 131.25°E	O	O				O		O
38	36.25°N, 131.75°E	O					O		O
39	36°N, 129.75°E				O
40	36°N, 130°E				O	O
41	36°N, 130.25°E				O
42	36°N, 130.5°E				O
43	36°N, 130.75°E					O
44	35.75°N, 129.75°E	O		O	O		O	O	O
45	35.75°N, 130°E				O
46	35.75°N, 130.25°E	O			O	O	O		O
47	35.75°N, 130.5°E				O
48	35.75°N, 130.75°E						O		O
49	35.5°N, 129.5°E				O
50	35.5°N, 129.75°E				O	O
51	35.5°N, 130°E				O
52	35.5°N, 130.25°E				O
53	35.5°N, 130.5°E				O
54	35.25°N, 129.25°E	O		O			O	O	O
55	35.25°N, 129.5°E				O
56	35.25°N, 129.75°E	O		O	O		O	O	O
57	35.25°N, 130°E				O	O
58	35.25°N, 130.25°E	O	O		O		O		O
59	35°N, 129°E				O
60	35°N, 129.25°E				O
61	34.75°N, 127.75°E			O				O
62	34.75°N, 128.25°E			O				O
63	34.75°N, 128.75°E	O		O	O	O	O	O	O
64	34.75°N, 129°E				O
65	34.75°N, 129.25°E	O		O			O	O	O
66	34.5°N, 128.25°E				O
67	34.5°N, 128.5°E				O
68	34.5°N, 128.75°E				O
69	34.5°N, 129°E				O
70	34.25°N, 127.75°E	O		O	O	O	O	O	O
71	34.25°N, 128°E				O
72	34.25°N, 128.25°E	O	O	O	O		O	O	O
73	34.25°N, 128.5°E				O
74	34.25°N, 128.75°E	O		O	O		O	O	O
75	34°N, 127.75°E				O
76	34°N, 128°E				O
77	34°N, 128.25°E				O
78	34°N, 128.5°E				O
79	33.75°N, 127.75°E	O		O	O		O	O	O
80	33.75°N, 128°E				O
81	33.75°N, 128.25°E	O		O	O		O	O	O
82	33.5°N, 127.75°E				O	O
83	33.5°N, 128°E				O
84	33.25°N, 127.75°E	O		O	O		O	O	O
85	37.25°N, 124.25°E	O		O			O	O	O
86	37.25°N, 124.75°E	O		O			O	O	O
87	37.25°N, 125.25°E	O	O	O			O	O	O
88	36.75°N, 123.75°E	O	O	O			O	O	O
89	36.75°N, 124.25°E	O		O			O	O	O
90	36.75°N, 124.75°E	O	O	O			O	O	O
91	36.75°N, 125.25°E	O		O			O	O	O
92	36.25°N, 123.25°E		O
93	36.25°N, 123.75°E	O					O		O
94	36.25°N, 124.25°E	O					O		O
95	36.25°N, 124.75°E	O		O			O	O	O
96	36.25°N, 125.25°E	O		O			O	O	O
97	36.25°N, 125.75°E			O				O
98	36°N, 124.75°E					O
99	36°N, 125.25°E					O
100	35.75°N, 123.25°E	O					O		O
101	35.75°N, 123.75°E	O					O		O
102	35.75°N, 124.25°E	O	O				O		O
103	35.75°N, 124.75°E	O		O			O	O	O
104	35.75°N, 125.25°E	O	O	O			O	O	O
105	35.75°N, 125.5°E					O
106	35.75°N, 125.75°E			O				O
107	35.5°N, 125°E					O
108	35.25°N, 122.25°E	O					O		O
109	35.25°N, 122.75°E	O	O				O		O
110	35.25°N, 123.25°E	O					O		O
111	35.25°N, 123.75°E	O		O			O	O	O
112	35.25°N, 124.25°E	O		O			O	O	O
113	35.25°N, 124.75°E	O		O			O	O	O
114	35.25°N, 125.25°E			O				O
115	35.25°N, 125.5°E					O
116	35°N, 125°E					O
117	34.75°N, 122.25°E	O					O		O
118	34.75°N, 122.75°E	O					O		O
119	34.75°N, 123.25°E	O					O		O
120	34.75°N, 123.75°E	O	O	O			O	O	O
121	34.75°N, 124.25°E	O		O			O	O	O
122	34.75°N, 124.75°E	O		O			O	O	O
123	34.75°N, 125.25°E			O		O		O
124	34.75°N, 125.75°E	O	O				O		O
125	34.5°N, 124.75°E					O
126	34.25°N, 122.25°E	O					O		O
127	34.25°N, 122.75°E	O					O		O
128	34.25°N, 123.25°E	O					O		O
129	34.25°N, 123.75°E	O		O			O	O	O
130	34.25°N, 124.25°E	O		O			O	O	O
131	34.25°N, 124.75°E	O	O	O			O	O	O
132	34.25°N, 125.25°E	O		O		O	O	O	O
133	34.25°N, 125.75°E	O		O			O	O	O
134	34.25°N, 126°E					O
135	34.25°N, 126.25°E	O		O			O	O	O
136	34.25°N, 126.75°E	O		O			O	O	O
137	34.25°N, 127.25°E	O
138	34°N, 125.5°E				O
139	34°N, 125.75°E				O
140	34°N, 126°E				O
141	34°N, 126.25°E				O
142	34°N, 126.5°E				O
143	34°N, 126.75°E				O
144	34°N, 127°E				O
145	34°N, 127.25°E				O
146	34°N, 127.5°E				O
147	33.75°N, 122.75°E	O					O		O
148	33.75°N, 123.25°E	O					O		O
149	33.75°N, 123.75°E	O	O	O			O	O	O
150	33.75°N, 124.25°E	O		O			O	O	O
151	33.75°N, 124.75°E	O		O		O	O	O	O
152	33.75°N, 125.25°E	O		O			O	O	O
153	33.75°N, 125.5°E				O
154	33.75°N, 125.75°E	O	O	O	O		O	O	O
155	33.75°N, 126°E				O
156	33.75°N, 126.25°E	O		O	O		O	O	O
157	33.75°N, 126.5°E				O
158	33.75°N, 126.75°E	O	O	O	O	O	O	O	O
159	33.75°N, 127°E				O
160	33.75°N, 127.25°E	O			O
161	33.75°N, 127.5°E				O
162	33.5°N, 125.5°E				O
163	33.5°N, 125.75°E				O	O
164	33.5°N, 126°E				O
165	33.5°N, 126.25°E				O
166	33.5°N, 127°E				O
167	33.5°N, 127.25°E				O
168	33.5°N, 127.5°E				O
169	33.25°N, 123.25°E	O					O		O
170	33.25°N, 123.75°E	O		O			O	O	O
171	33.25°N, 124.25°E	O		O			O	O	O
172	33.25°N, 124.75°E	O	O	O			O	O	O
173	33.25°N, 125.25°E	O		O			O	O	O
174	33.25°N, 125.5°E				O
175	33.25°N, 125.75°E	O		O	O		O	O	O
176	33.25°N, 126°E				O
177	33.25°N, 126.25°E	O	O	O			O	O	O
178	33.25°N, 126.75°E	O		O	O		O	O	O
179	33.25°N, 127°E				O
180	33.25°N, 127.25°E				O		O
181	33.25°N, 127.5°E				O
182	33°N, 125°E					O
183	33°N, 125.5°E				O
184	33°N, 125.75°E				O
185	33°N, 126°E				O
186	33°N, 126.25°E				O	O
187	33°N, 126.5°E				O
188	33°N, 126.75°E				O
189	33°N, 127°E				O	O
190	33°N, 127.25°E				O
191	33°N, 127.5°E				O
192	32.75°N, 123.75°E	O					O
193	32.75°N, 124.25°E	O		O			O	O	O
194	32.75°N, 124.75°E	O		O			O	O	O
195	32.75°N, 125.25°E	O		O			O	O	O
196	32.75°N, 125.5°E				O
197	32.75°N, 125.75°E	O	O	O	O		O	O	O
198	32.75°N, 126°E				O
199	32.75°N, 126.25°E	O		O	O		O	O	O
200	32.75°N, 126.5°E				O
201	32.75°N, 126.75°E			O	O		O	O	O
202	32.75°N, 127°E				O
203	32.75°N, 127.25°E				O		O
204	32.75°N, 127.5°E				O
205	32.5°N, 125.5°E				O	O
206	32.5°N, 125.75°E				O
207	32.5°N, 126°E				O
208	32.5°N, 126.25°E				O
209	32.5°N, 126.5°E				O
210	32.5°N, 126.75°E				O
211	32.5°N, 127°E				O
212	32.5°N, 127.25°E				O
213	32.5°N, 127.5°E				O
214	32.25°N, 124.25°E	O					O		O
215	32.25°N, 124.75°E	O	O	O			O	O	O
216	32.25°N, 125.25°E	O		O			O	O	O
217	32.25°N, 125.5°E				O
218	32.25°N, 125.75°E	O		O	O		O	O	O
219	32.25°N, 126°E				O
220	32.25°N, 126.25°E	O		O	O		O	O	O
221	32.25°N, 126.5°E				O
222	32.25°N, 126.75°E				O		O		O
223	32.25°N, 127°E				O
224	32.25°N, 127.25°E	O		O	O
225	32°N, 125.5°E				O
226	32°N, 125.75°E				O
227	32°N, 126°E				O
228	32°N, 126.25°E				O
229	32°N, 126.5°E				O
230	32°N, 126.75°E				O
231	32°N, 127°E				O
232	32°N, 127.25°E				O
233	31.75°N, 124.75°E	O					O		O
234	31.75°N, 125.25°E	O					O		O
235	31.75°N, 125.5°E				O
236	31.75°N, 125.75°E	O	O		O	O	O		O
237	31.75°N, 126°E				O
238	31.75°N, 126.25°E	O			O		O		O
239	31.75°N, 126.5°E				O
240	31.75°N, 126.75°E				O		O		O
241	31.75°N, 127°E				O
242	31.75°N, 127.25°E	O	O		O		O		O
243	31.5°N, 125.5°E				O
244	31.5°N, 125.75°E				O
245	31.5°N, 126°E				O
246	31.5°N, 126.25°E				O
247	31.5°N, 126.5°E				O
248	31.5°N, 126.75°E				O
249	31.5°N, 127°E				O	O
250	31.25°N, 124.75°E	O					O		O
251	31.25°N, 125.25°E	O					O		O
252	31.25°N, 125.75°E	O					O		O
253	31.25°N, 126.25°E	O					O		O
254	31.25°N, 126.75°E	O					O		O
255	30.75°N, 124.75°E	O					O		O
256	30.75°N, 125.25°E	O					O		O
257	30.75°N, 125.75°E	O					O		O
258	30.75°N, 126.25°E	O					O		O
* A circle indicates where the sample was collected. The number in parentheses represents the number of samples.
