# Supplementary material for: Development of the cephalopod-specific universal primer set and its application for the metabarcoding analysis of planktonic cephalopods in Korean waters
Source: PeerJ. 2019 Jun 13;7:e7140. doi: 10.7717/peerj.7140 (PMC6571131; doi:10.7717/peerj.7140)
Supplement: Supplemental Information 2 [file peerj-07-7140-s002.xlsx]

## Sheet: Sheet1
Species	GenBank number	Identity (%)	Sequence name
Todarodes pacificus	AB240153	99	Todarodes pacificus Type1
Todarodes pacificus	AB240153	99	Todarodes pacificus Type2
Watasenia scintillans	AB240152	99	Watasenia scintillans Type1
Watasenia scintillans	AB240152	100	Watasenia scintillans Type2
Watasenia scintillans	AB240152	99	Watasenia scintillans Type3
Sepiola birostrata	MH165177	100	Sepiola birostrata Type1
Sepiola birostrata	MH165177	99	Sepiola birostrata Type2
Sepiola birostrata	MH165177	99	Sepiola birostrata Type3
Sepiola birostrata	MH165177	99	Sepiola birostrata Type4
Sthenoteuthis oualaniensis	EU660577	99	Sthenoteuthis oualaniensis Type1
Loliolus uyii	KP265013	100	Loliolus uyii Type1
Octopus vulgaris	AB158363	99	Octopus vulgaris Type1
Octopus vulgaris	AB158363	99	Octopus vulgaris Type2
Todarodes pacificus	AB240153	98	Todarodes sp. Type1
Todarodes pacificus	AB240153	98	Todarodes sp. Type2
Todarodes pacificus	AB240153	98	Todarodes sp. Type3
Todarodes pacificus	AB240153	98	Todarodes sp. Type4
Todarodes pacificus	AB240153	98	Todarodes sp. Type5
Todarodes pacificus	AB240153	98	Todarodes sp. Type6
Todarodes pacificus	AB240153	98	Todarodes sp. Type7
Todarodes pacificus	AB240153	98	Todarodes sp. Type8
Todarodes pacificus	AB240153	95	Todarodes sp. Type9
Watasenia scintillans	AB240152	98	Watasenia sp. Type1
Watasenia scintillans	AB240152	98	Watasenia sp. Type2
Watasenia scintillans	AB240152	98	Watasenia sp. Type3
Watasenia scintillans	AB240152	98	Watasenia sp. Type4
Watasenia scintillans	AB240152	98	Watasenia sp. Type5
Watasenia scintillans	AB240152	97	Watasenia sp. Type6
Watasenia scintillans	AB240152	98	Watasenia sp. Type7
Watasenia scintillans	AB240152	98	Watasenia sp. Type8
Watasenia scintillans	AB240152	98	Watasenia sp. Type9
Sepiola birostrata	MH165177	96	Sepiola sp. Type1
Loliolus japonica	NC030208	92	Loliolus sp. Type1
Loliolus uyii	KP265013	98	Loliolus sp. Type2
Loliolus uyii	KP265013	98	Loliolus sp. Type3
Amphioctopus marginatus	KY646153	90	Amphioctopus sp. Type1
Dosidicus gigas	EU068697	90	Dosidicus sp. Type1
Uroteuthis duvaucelii	KR051264	94	Uroteuthis sp. Type1
Uroteuthis duvaucelii	KR051264	94	Uroteuthis sp. Type2
Uroteuthis duvaucelii	KR051264	94	Uroteuthis sp. Type3
Idiosepius sp.	KF647895	95	Idiosepius sp. Type1
Illex argentinus	KP336702	84	Unidentified Type1
Bathyteuthis abyssicola	AP012225	88	Unidentified Type2
Bathyteuthis abyssicola	AP012225	88	Unidentified Type3
Illex argentinus	KP336702	84	Unidentified Type4
Illex argentinus	KP336702	84	Unidentified Type5
Illex argentinus	KP336702	84	Unidentified Type6
